# Supplementary material for: Attendance-Based Adherence and Outcomes of Obesity Management Program in Arab Adolescents
Source: MDPI journal article supplement (doi:10.3390/children10091449), 2023-08-25
Supplement: s1 [file s1]

Table S1: Baseline clinical characteristic of all participants

| Parameters               | Nonadherent  | Adherent     | P-Value |
|--------------------------|--------------|--------------|---------|
| N                        | 154          | 209          |         |
| M/F                      | 124/30       | 87/122       |         |
| Overweight and obese (%) | 32 (35/17)   | 44 (49/39)   |         |
| Hypertension (%)         | 14           | 23           |         |
| Age (years)              | 14.9 ± 1.6   | 14.9 ± 1.7   | 0.66    |
| Height (cm)              | 158.7 ± 9.5  | 156.0 ± 9.4  | 0.003   |
| Weight (kg)              | 58.2 ± 18.3  | 58.3 ± 17.5  | 0.98    |
| BMI (kg/m <sup>2</sup> ) | 22.9 ± 6.0   | 23.8 ± 6.1   | 0.19    |
| BMI Z-score              | -0.01 ± 0.99 | 0.12 ± 1.0   | 0.26    |
| Waist (cm)               | 74.6 ± 17.5  | 74.2 ± 14.6  | 0.80    |
| Hip (cm)                 | 81.8 ± 23.5  | 88.7 ± 19.8  | 0.001   |
| WHR                      | 0.86 ± 0.09  | 0.84 ± 0.11  | 0.12    |
| SBP (mmHg)               | 120.6 ± 13.5 | 121.2 ± 16.4 | 0.73    |
| DBP (mmHg)               | 68.7 ± 8.8   | 72.8 ± 11.6  | <0.001  |
| Glucose (mmol/l)         | 5.25 ± 1.0   | 5.23 ± 0.70  | 0.84    |
| HbA1C (%)                | 5.20 ± 0.6   | 5.07 ± 0.56  | 0.22    |
| TC (mmol/l)              | 4.33 ± 0.8   | 4.44 ± 0.71  | 0.20    |
| HDL-C (mmol/l)           | 1.01 ± 0.2   | 0.96 ± 0.26  | 0.04    |
| LDL-C (mmol/l)           | 2.83 ± 0.7   | 2.98 ± 0.6   | 0.03    |
| TG (mmol/l)              | 1.09 ± 0.5   | 1.08 ± 0.56  | 0.92    |

Note: Data Presented mean ± SD. *P*-value significant at 0.01 and 0.05 level. BMI, Body Mass Index; WHR, Waist Hip Ratio; SBP, Systolic Blood Pressure; DBP, Diastolic Blood Pressure; HbA1C, glycated hemoglobin; TC, Total Cholesterol; HDL-c, High Density Lipoprotein Cholesterol; LDL-c, Low Density Lipoprotein Cholesterol; TG, Triglycerides.

Table S2: Pre- and post-intervention clinical characteristic of boys and girls

| Parameters       | Males       |             |            |             | P      | Females     |              |            |             | P      |
|------------------|-------------|-------------|------------|-------------|--------|-------------|--------------|------------|-------------|--------|
|                  | Nonadherent |             | Adherent   |             |        | Nonadherent |              | Adherent   |             |        |
|                  | Baseline    | Follow-Up   | Baseline   | Follow-Up   |        | Baseline    | Follow-Up    | Baseline   | Follow-Up   |        |
| N                | 124         |             | 87         |             |        | 30          |              | 122        |             |        |
| Age (years)      | 14.9±1.5    |             | 15.1±1.6   |             | 0.64   | 15.1±1.9    |              | 14.8±1.7   |             | 0.42   |
| Weight (Kg)      | 59.9±19.6   | 62.6±18.3** | 62.3±20.2  | 64.4±18.2** | 0.46   | 51.2±8.6    | 52.8±7.9**   | 55.5±14.8  | 57.2±12.6** | 0.11   |
| BMI (kg/m2)      | 23.3±6.4    | 22.3±6.4**  | 24.5±6.8   | 23.1±6.7**  | 0.29   | 21.3±3.5    | 21.4±3.7     | 23.4±5.6   | 21.4±4.6**  | 0.30   |
| BMI Z-score      | 0.04±1.07   | 0.11±1.14   | 0.16±1.10  | 0.19±1.15   | 0.57   | -0.23±0.59  | 0.03±0.64**  | 0.09±0.9   | -0.01±0.81* | 0.42   |
| Waist (cm)       | 76.2±18.9   | 87.6±9.3**  | 76.5±18.3  | 88.3±10.8** | 0.75   | 70.8±8.9    | 78.6±11.4*   | 72.7±11.2  | 63.3±8.7**  | <0.001 |
| Hip (cm)         | 78.9±25.3   | 92.3±11.2** | 86.3±20.1  | 93.1±11.4** | 0.047  | 92.0±8.9    | 92.1±13.3    | 90.5±12.5  | 72.1±10.6** | <0.001 |
| WHR              | 0.89±0.08   | 0.94±0.05** | 0.89±0.08  | 0.95±0.03** | 0.50   | 0.76±0.06   | 0.85±0.16*   | 0.80±0.13  | 0.88±0.07** | 0.03   |
| SBP (mmHg)       | 121 ±13.8   | 117.7±7.6   | 117.8±15.6 | 117.9±9.2   | 0.29   | 120.7±12.6  | 111.9±11.2** | 123.7±16.6 | 97.3±9.0**  | 0.004  |
| DBP (mmHg)       | 67.3±8.1    | 75.7±7.5**  | 67.3±10.1  | 73.9±8.1**  | 0.30   | 74.4±9.5    | 75.6±5.6     | 77.1±10.9  | 70.1±4.3**  | 0.21   |
| Glucose (mmol/l) | 5.3±1.1     | 5.7±2.3     | 5.2±0.6    | 5.8±1.7**   | 0.87   | 5.0±0.5     | 5.4±1.8      | 5.2±0.6    | 5.3±2.6     | 0.74   |
| HbA1C (%)        | 5.2±0.7     | 5.3±1.04    | 5.3±0.6    | 5.2±1.3     | 0.81   | 4.9±0.4     | 5.6±1.2**    | 4.9±0.5    | 5.5±1.39**  | 0.67   |
| TC (mmol/l)      | 4.4±0.8     | 6.1±1.1**   | 4.6±0.7    | 6.2±1.4**   | 0.21   | 4.2±0.8     | 5.4±1.3**    | 4.4±0.7    | 5.6±1.3**   | 0.25   |
| HDL-C (mmol/l)   | 1.0±0.2     | 1.4±0.4**   | 1.0±0.18   | 1.1±0.51    | <0.001 | 0.98±0.3    | 1.8±0.3**    | 0.90±0.3   | 1.7±0.6**   | 0.13   |
| LDL-C (mmol/l)   | 2.9±0.7     | 3.9±0.9**   | 3.0±0.6    | 4.2±1.2**   | 0.02   | 2.9±0.6     | 3.0±1.1      | 3.0±0.6    | 3.3±1.1     | 0.08   |
| TG (mmol/l)      | 1.1±0.5     | 1.9±0.8**   | 1.2±0.7    | 2.0±0.9**   | 0.28   | 0.94±0.4    | 1.4±0.6**    | 1.0±0.4    | 1.4±0.6**   | 0.57   |

Note: Data Presented mean ± SD. \* and \*\* represented p-value significant at 0.05 and 0.01 level for pre- and post-intervention and p-value was obtained for group effect for males and females subjects. BMI, Body Mass Index; WHR, Waist Hip Ratio; SBP, Systolic Blood Pressure; DBP, Diastolic Blood Pressure; HbA1C, glycated hemoglobin; TC, Total Cholesterol; HDL-c, High Density Lipoprotein Cholesterol; LDL-c, Low Density Lipoprotein Cholesterol; TG, Triglycerides.
